# Supplementary material for: Refining multi-model projections of temperature extremes by evaluation against land–atmosphere coupling diagnostics
Source: Copernicus journal article supplement (doi:10.5194/esd-2016-48), 2016-10-27
Supplement: Supplementary file 1 [file esd-2016-48-supplement.pdf]

## Contents

|    |                                                                                                                                        |             |
|----|----------------------------------------------------------------------------------------------------------------------------------------|-------------|
|    | <b>S1 Supplementary Figures</b>                                                                                                        | <b>S-2</b>  |
|    | On the use of tail-based coincidence metrics as opposed to correlations-based metrics . . . . .                                        | S-2         |
|    | Land-atmosphere coupling in individual seasons and alternative metrics for model evaluation . . . . .                                  | S-3         |
| 5  | Is land-atmosphere coupling a model-inherent feature? . . . . .                                                                        | S-7         |
|    | Global patterns of land-atmosphere coupling in models and observations . . . . .                                                       | S-9         |
|    | Bivariate T-ET dependence structure in coupling sensitive regions in the warm season . . . . .                                         | S-10        |
|    | Is there a link between VAC-diagnosed land-atmosphere coupling and (absolute) precipitation or evapotranspiration<br>fluxes? . . . . . | S-13        |
| 10 | On constraining model-projected warming by land-atmosphere coupling metrics . . . . .                                                  | S-14        |
|    | <b>S2 Supplementary Tables</b>                                                                                                         | <b>S-15</b> |

## S1 Supplementary Figures

### On the use of tail-based coincidence metrics as opposed to correlations-based metrics

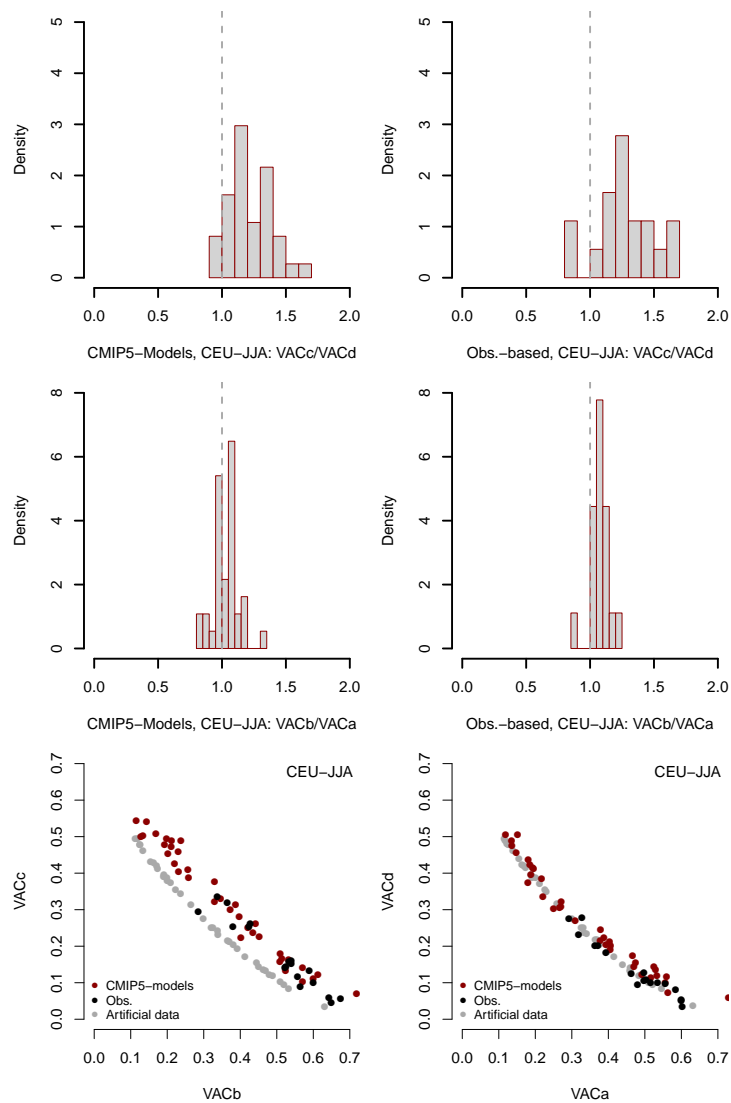

**Figure S1.** (Top) Ratio of  $VAC_c/VAC_d$  occurrences in CMIP5 models (left) and observations (right). (Middle) Ratio of  $VAC_b/VAC_a$  occurrences in CMIP5 models (left) and observations (right). (Bottom) Comparison of  $VAC_b/VAC_c$  occurrences (left) and  $VAC_a/VAC_d$  occurrences (right) in models, observations and artificial data. More frequent occurrences of  $VAC_c$  than would be expected in a symmetric dependence structure (as diagnosed e.g. by correlation-based metrics) indicate that the application of coincidences is appropriate.

## Land-atmosphere coupling in individual seasons and alternative metrics for model evaluation

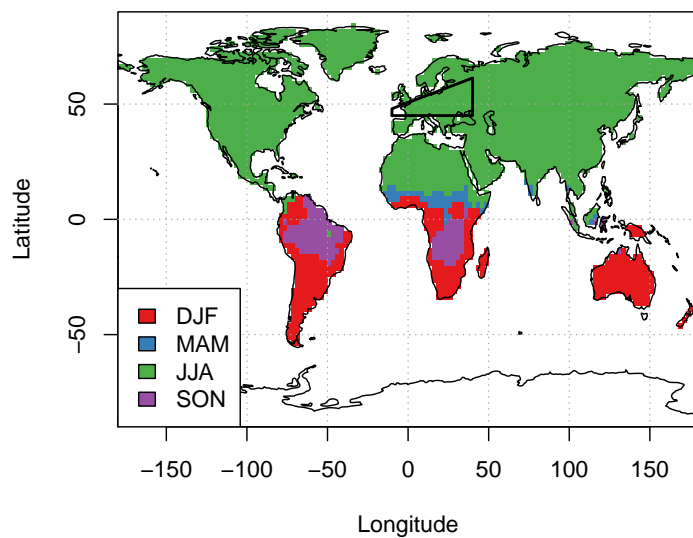

**Figure S2.** Definition of "warm season" in this study based on long-term seasonal temperatures in the CRU dataset.

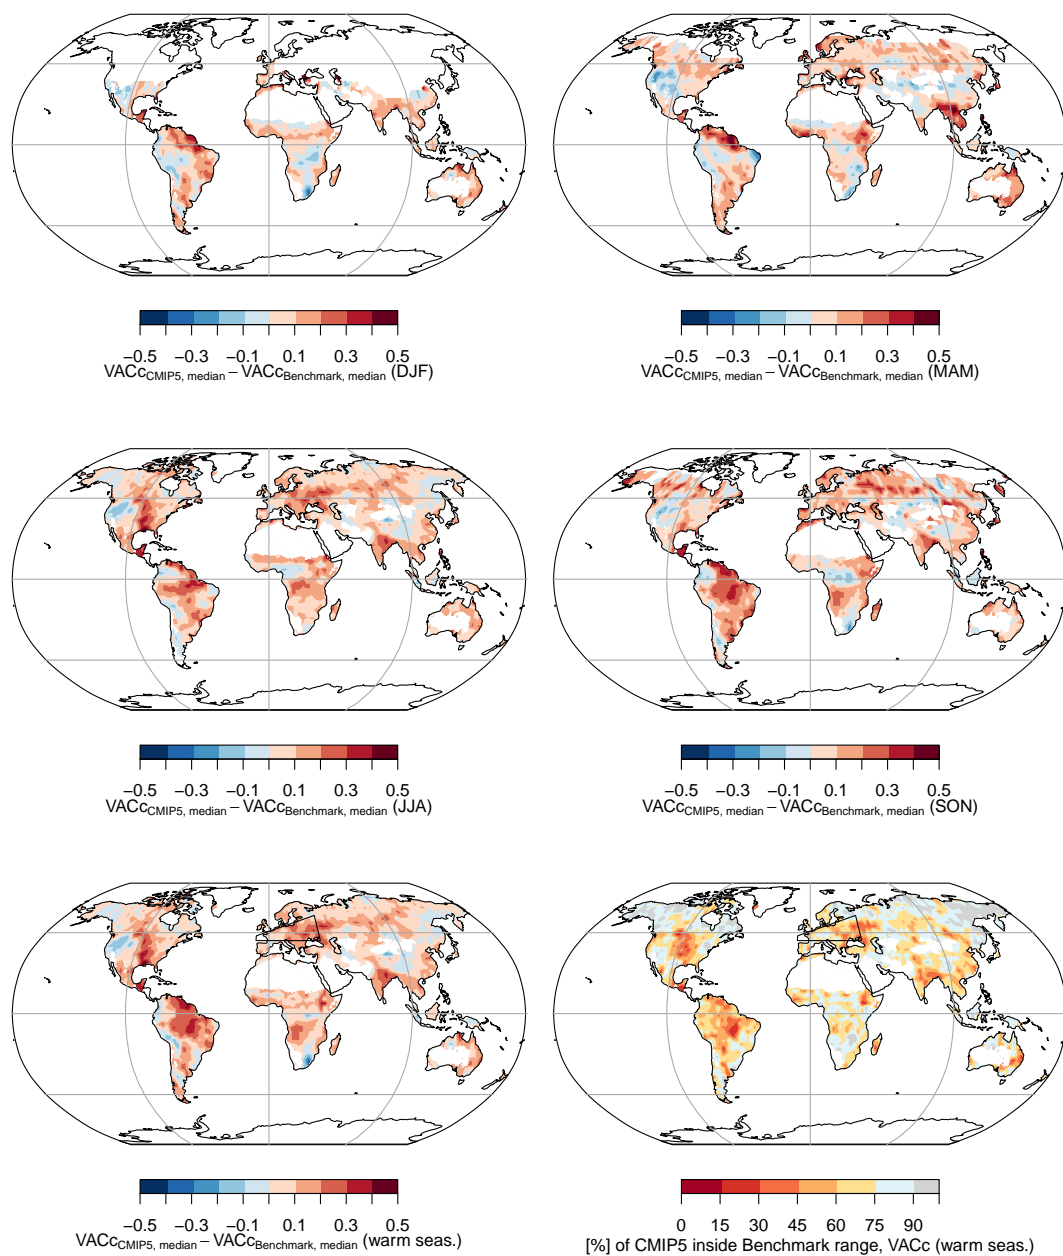

**Figure S3.** Difference in median  $VAC_c$  in CMIP5 models and observations in (top left) DJF, (top right) MAM, (middle left) JJA, and (middle right) SON, the warm season (bottom left). (Bottom right) Fraction of models that are within the 5th to 95th percentile of the ensemble of observations in the warm season ( $VAC_c$ ).

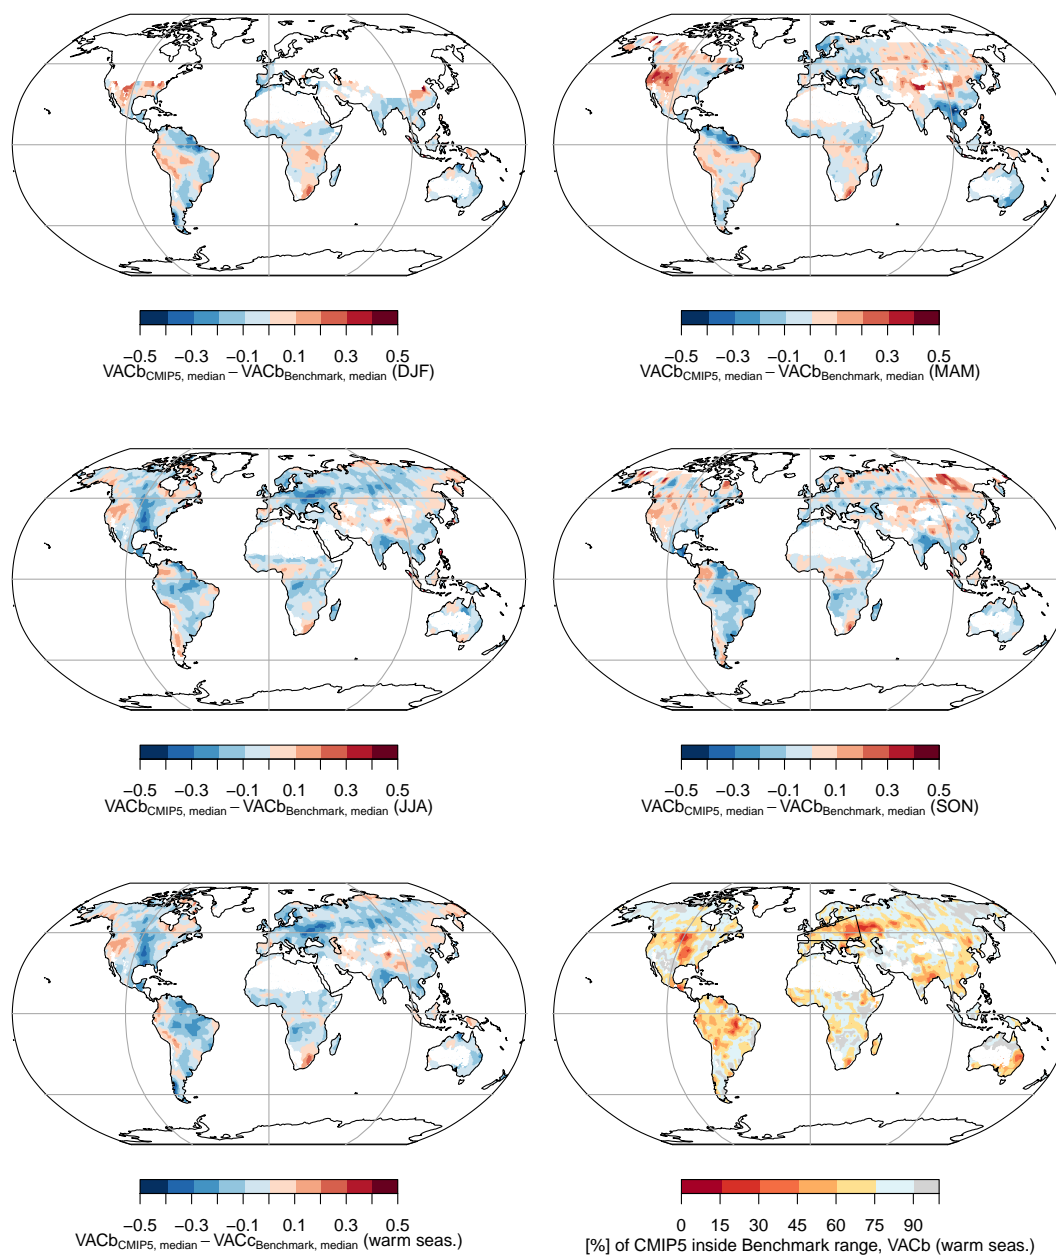

**Figure S4.** Difference in median  $VAC_b$  in CMIP5 models and observations in (top left) DJF, (top right) MAM, (middle left) JJA, and (middle right) SON, the warm season (bottom left). (Bottom right) Fraction of models that are within the 5th to 95th percentile of the ensemble of observations in the warm season ( $VAC_b$ ).

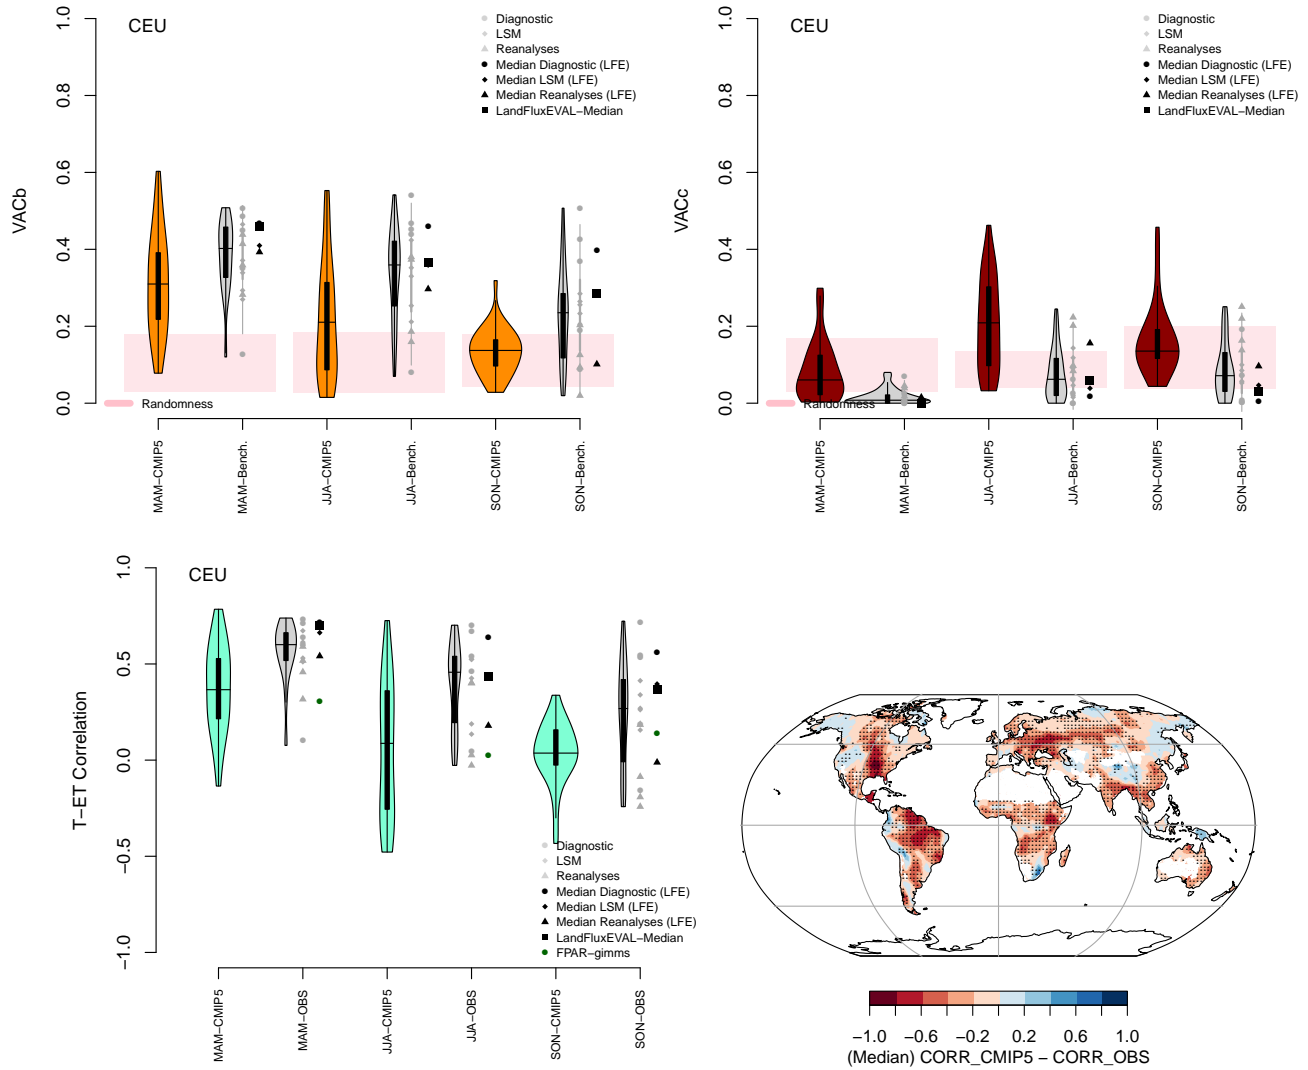

**Figure S5.** Land-atmosphere coupling in Central Europe in CMIP5 models and observations as diagnosed through (top left)  $VAC_b$  and (top right)  $VAC_c$  based on 90th percentile thresholds, and (bottom left) the Pearson correlation of T and ET anomalies. (Bottom right) Difference in median Pearson correlation in CMIP5 models and observations in the warm season.

## Is land-atmosphere coupling a model-inherent feature?

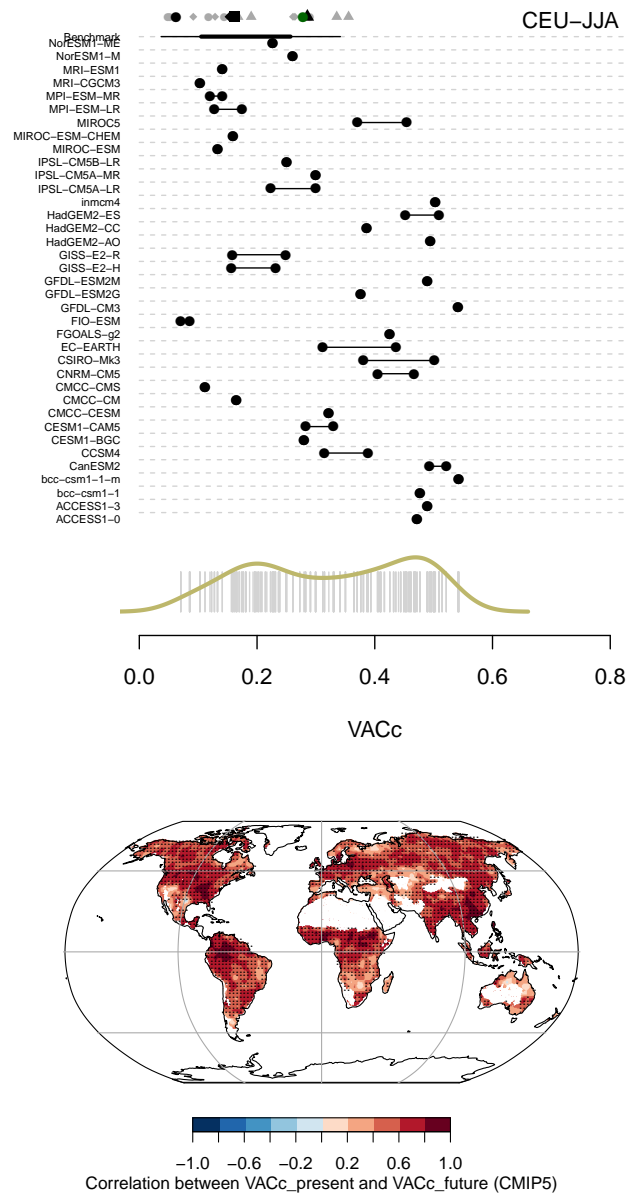

**Figure S6.** (Top)  $VAC_c$  occurrences in Central Europe (JJA) in individual models. (Bottom) Correlation between present-day and future land-atmosphere coupling reveal that occurrences of  $VAC_c$  are largely model-inherent features.

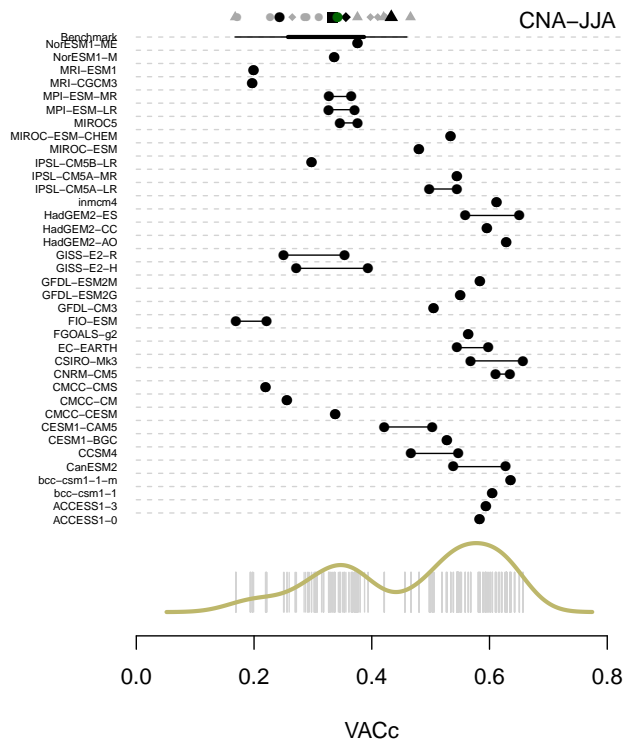

**Figure S7.**  $VAC_c$  occurrences in Central North America (JJA) in individual models.



## Global patterns of land-atmosphere coupling in models and observations

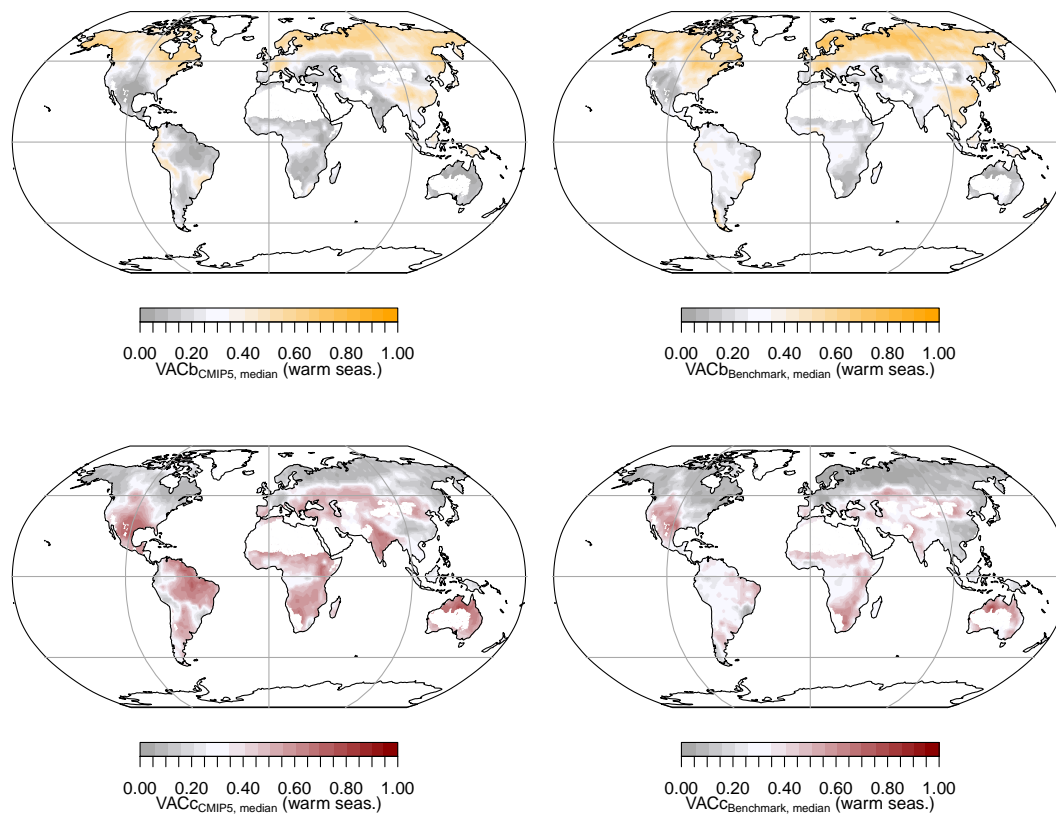

**Figure S8.** Global patterns in land-atmosphere coupling as diagnosed through (top)  $VAC_b$  and (bottom)  $VAC_c$ : ensemble median  $VAC_b/VAC_c$  in CMIP5 models (left) and ensemble median of the observations-based datasets (right).

## Bivariate T-ET dependence structure in coupling sensitive regions in the warm season

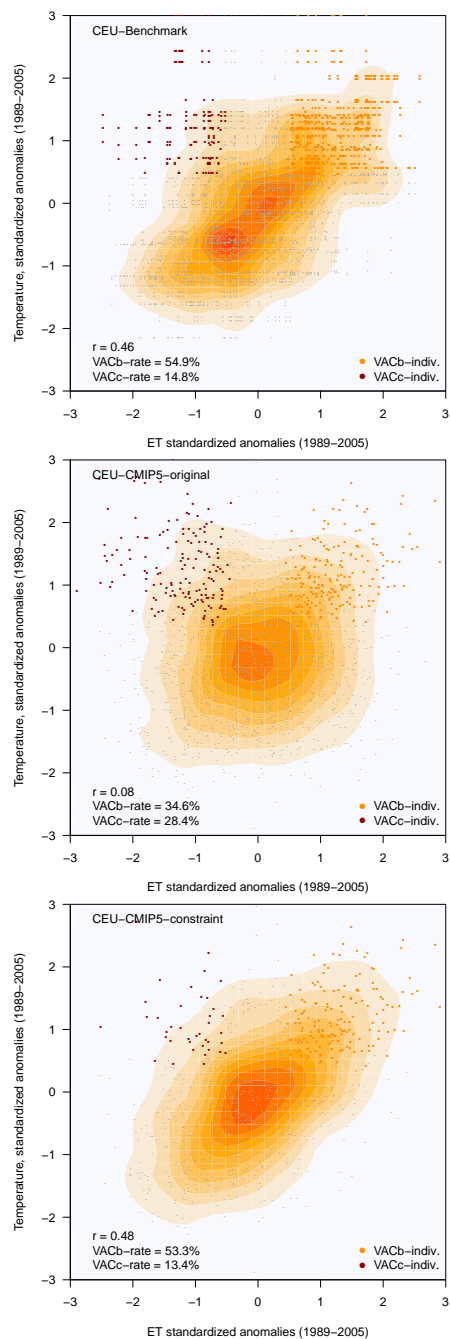

**Figure S9.** Bivariate kernel density estimates of T-ET relationship in Central Europe in the observations-based benchmarking datasets (Top), the original (middle) and constrained (bottom) CMIP5 ensemble.

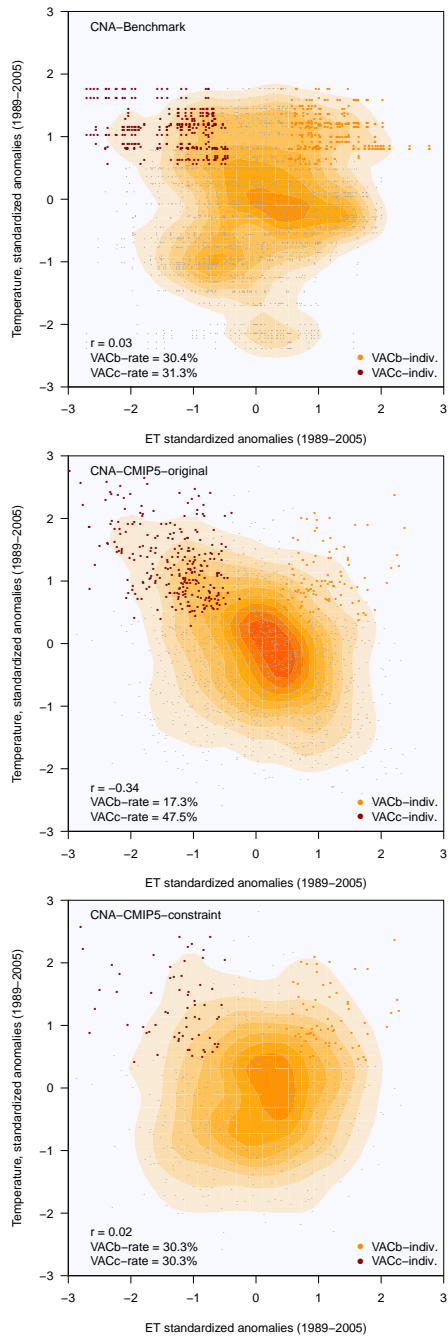

**Figure S10.** Bivariate kernel density estimates of T-ET relationship in Central North America in the observations-based benchmarking datasets (Top), the original (middle) and constrained (bottom) CMIP5 ensemble.

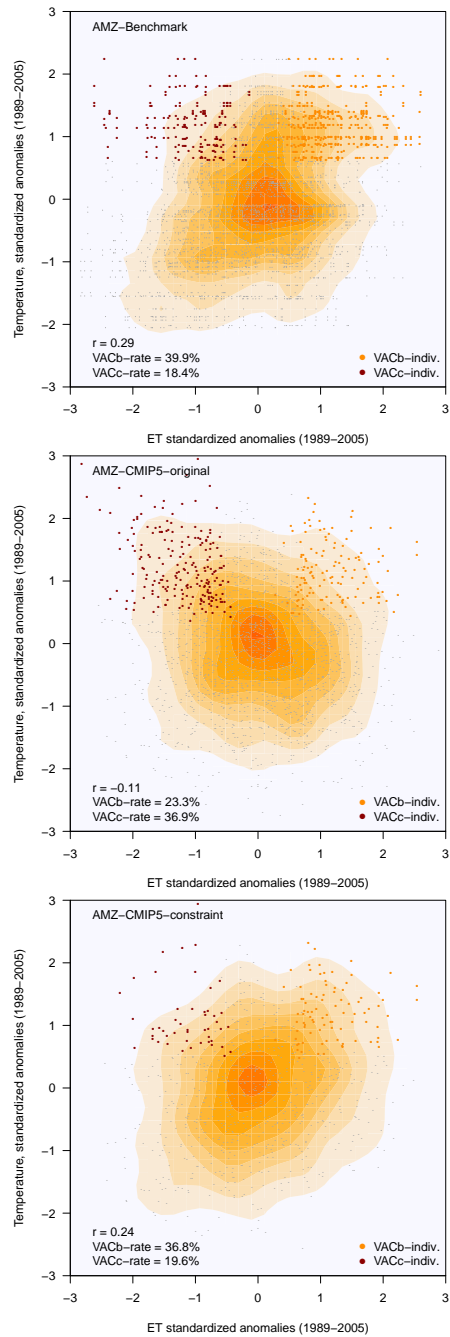

**Figure S11.** Bivariate kernel density estimates of T-ET relationship in the Amazon region in the observations-based benchmarking datasets (Top), the original (middle) and constrained (bottom) CMIP5 ensemble.

Is there a link between VAC-diagnosed land-atmosphere coupling and (absolute) precipitation or evapotranspiration fluxes?

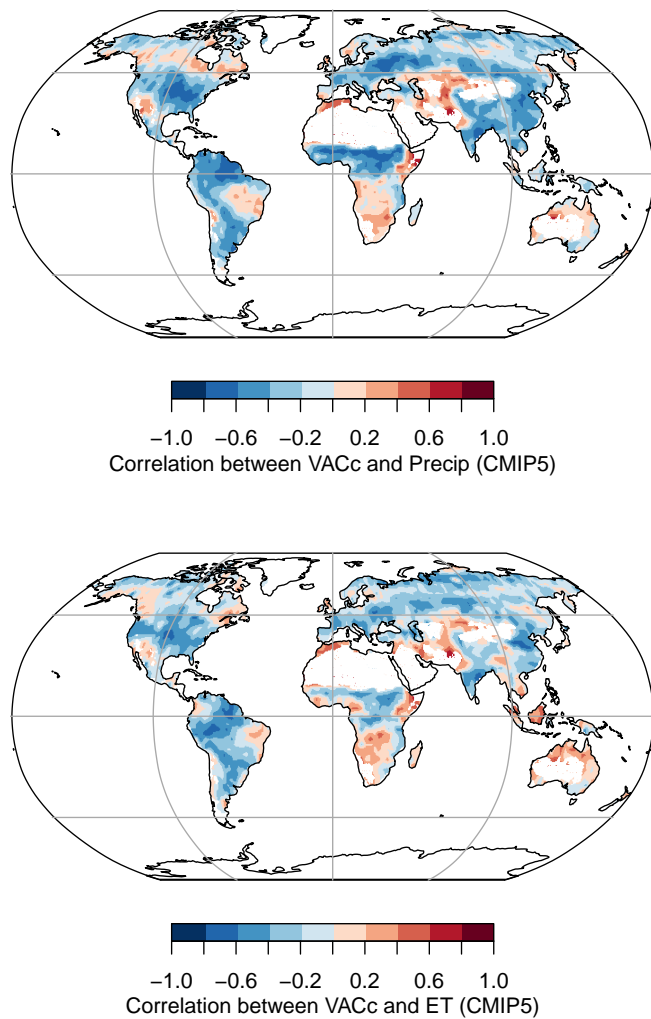

**Figure S12.** Pearson correlation between (top)  $VAC_c$  and rainfall, and (bottom)  $VAC_c$  and evapotranspiration across the CMIP5 multi-model ensemble.

## On constraining model-projected warming by land-atmosphere coupling metrics

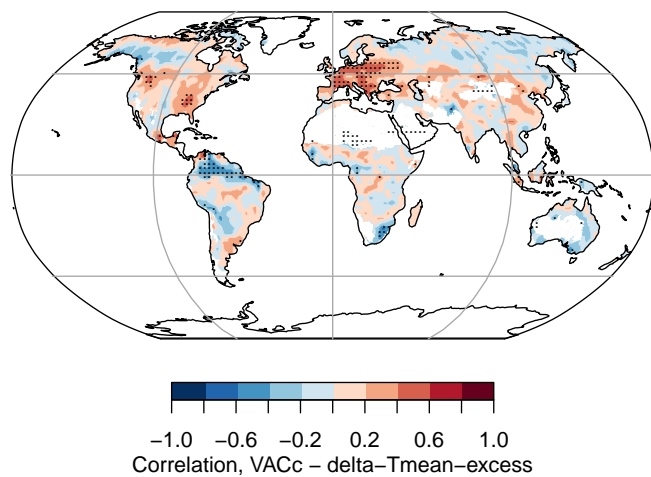

**Figure S13.** Correlation between  $VAC_c$  and the "excess" warming in the warm season (difference between warm season warming and annual mean warming). In boreal regions, the "summer excess warming", is not related to  $VAC_c$ .

## S2 Supplementary Tables

**Table S1.** CMIP5 models used for analysis

| Model name     | Variable   | Ensemble member | Scenario           |
|----------------|------------|-----------------|--------------------|
| ACCESS1-0      | T, ET, TXx | rlilp1          | Historical, RCP8.5 |
| ACCESS1-3      | T, ET, TXx | rlilp1          | Historical, RCP8.5 |
| bcc-csm1-1     | T, ET, TXx | rlilp1          | Historical, RCP8.5 |
| bcc-csm1-1-m   | T, ET, TXx | rlilp1          | Historical, RCP8.5 |
| CanESM2        | T, ET, TXx | rlilp1          | Historical, RCP8.5 |
| CCSM4          | T, ET, TXx | rlilp1          | Historical, RCP8.5 |
| CESM1-BGC      | T, ET, TXx | rlilp1          | Historical, RCP8.5 |
| CESM1-CAM5     | T, ET, TXx | rlilp1          | Historical, RCP8.5 |
| CMCC-CESM      | T, ET, TXx | rlilp1          | Historical, RCP8.5 |
| CMCC-CM        | T, ET, TXx | rlilp1          | Historical, RCP8.5 |
| CMCC-CMS       | T, ET, TXx | rlilp1          | Historical, RCP8.5 |
| CNRM-CM5       | T, ET, TXx | rlilp1          | Historical, RCP8.5 |
| CSIRO-Mk3      | T, ET, TXx | rlilp1          | Historical, RCP8.5 |
| EC-EARTH       | T, ET, TXx | r2ilp1          | Historical, RCP8.5 |
| FGOALS-g2      | T, ET, TXx | rlilp1          | Historical, RCP8.5 |
| FIO-ESM        | T, ET      | rlilp1          | Historical, RCP8.5 |
| GFDL-CM3       | T, ET, TXx | rlilp1          | Historical, RCP8.5 |
| GFDL-ESM2G     | T, ET, TXx | rlilp1          | Historical, RCP8.5 |
| GFDL-ESM2M     | T, ET, TXx | rlilp1          | Historical, RCP8.5 |
| GISS-E2-H      | T, ET, TXx | r6ilp1          | Historical, RCP8.5 |
| GISS-E2-R      | T, ET, TXx | r6ilp1          | Historical, RCP8.5 |
| HadGEM2-AO     | T, ET, TXx | rlilp1          | Historical, RCP8.5 |
| HadGEM2-CC     | T, ET, TXx | rlilp1          | Historical, RCP8.5 |
| HadGEM2-ES     | T, ET, TXx | rlilp1          | Historical, RCP8.5 |
| inmcm4         | T, ET, TXx | rlilp1          | Historical, RCP8.5 |
| IPSL-CM5A-LR   | T, ET, TXx | rlilp1          | Historical, RCP8.5 |
| IPSL-CM5A-MR   | T, ET, TXx | rlilp1          | Historical, RCP8.5 |
| IPSL-CM5B-LR   | T, ET, TXx | rlilp1          | Historical, RCP8.5 |
| MIROC-ESM      | T, ET, TXx | rlilp1          | Historical, RCP8.5 |
| MIROC-ESM-CHEM | T, ET, TXx | rlilp1          | Historical, RCP8.5 |
| MIROC5         | T, ET, TXx | rlilp1          | Historical, RCP8.5 |
| MPI-ESM-LR     | T, ET, TXx | rlilp1          | Historical, RCP8.5 |
| MPI-ESM-MR     | T, ET, TXx | rlilp1          | Historical, RCP8.5 |
| MRI-CGCM3      | T, ET, TXx | rlilp1          | Historical, RCP8.5 |
| MRI-ESM1       | T, ET, TXx | rlilp1          | Historical, RCP8.5 |
| NorESM1-M      | T, ET, TXx | rlilp1          | Historical, RCP8.5 |
| NorESM1-ME     | T, ET      | rlilp1          | Historical, RCP8.5 |
